# Supplementary material for: Systematic Modification and Evaluation of Enzyme-Loaded Chitosan Nanoparticles
Source: MDPI journal article supplement (doi:10.3390/ijms22157987), 2021-07-26
Supplement: s1 [file s1]

SUPPLEMENTARY DATA

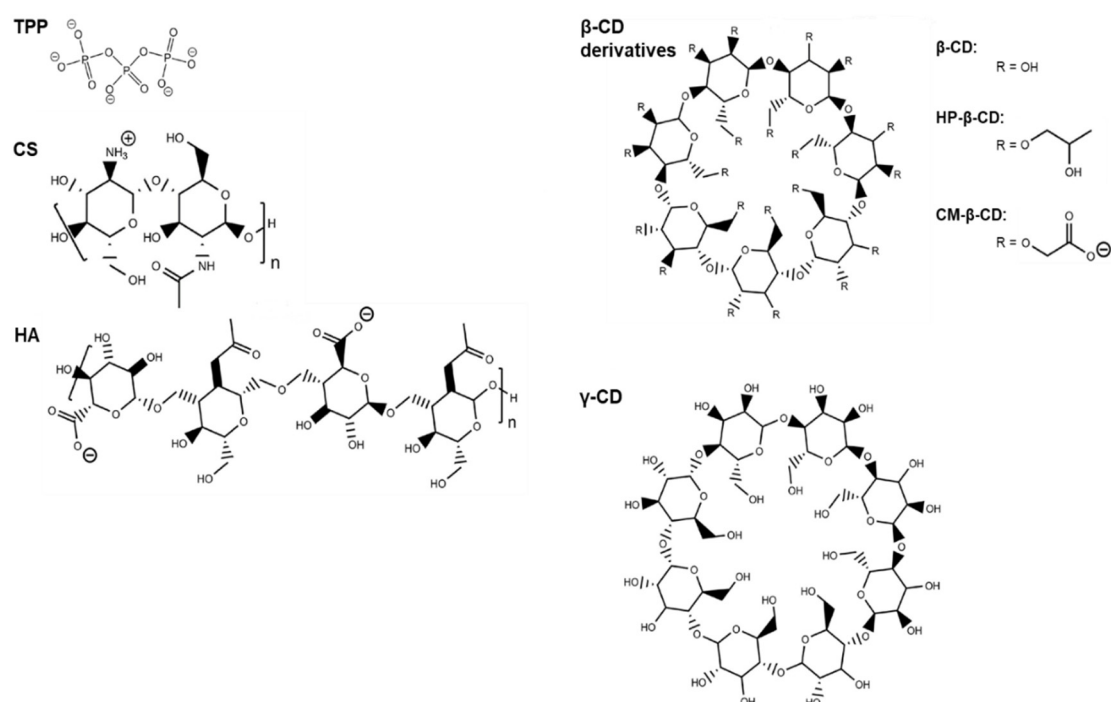

**Figure S1.** Chemical structure of raw materials utilized in nanoparticles. (TPP) tripolyphosphate; (CS) chitosan; (HA) hyaluronic acid; (CD) cyclodextrins: β-CD, hydroxypropyl-β-CD (HP-β-CD) carboxymethyl β-CD and γ-CD.

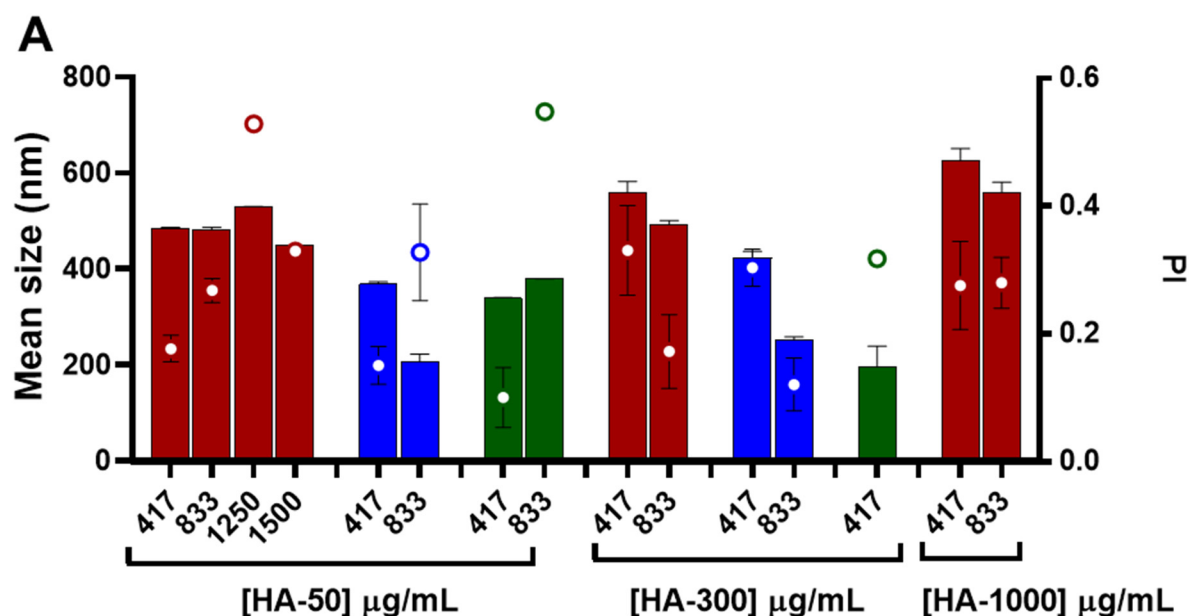

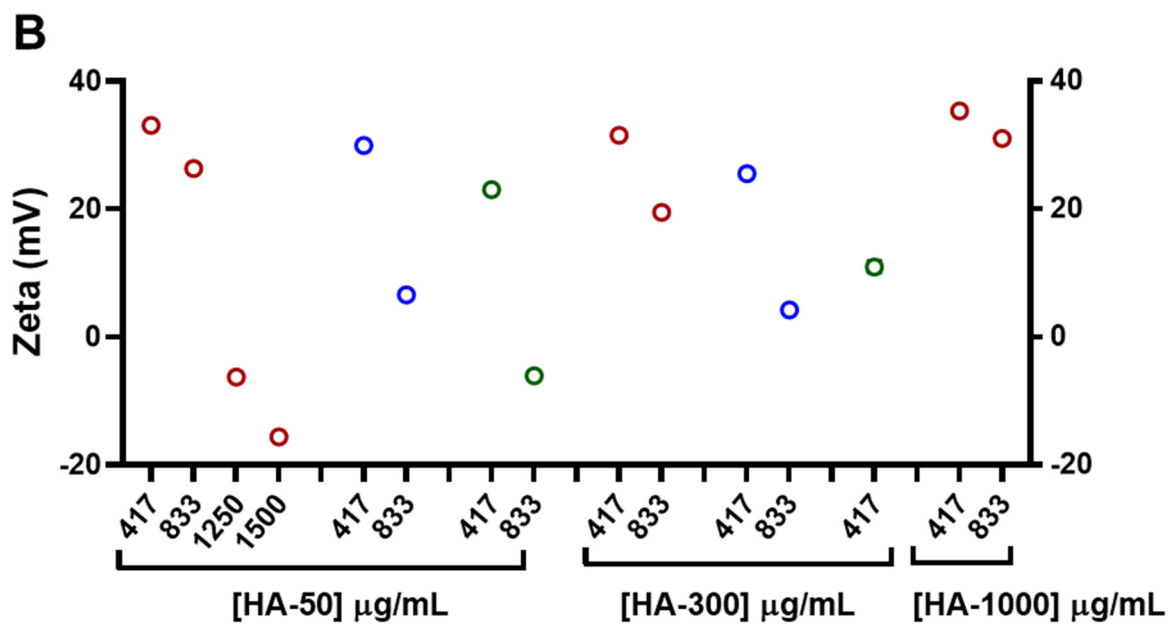

**Figure S2.** Characteristics of the chitosan-tripolyphosphate (CS-TPP) nanoparticles modified with hyaluronic acid (HA) at high HA loading of 417, 833, 1250 and 1500  $\mu\text{g/mL}$  depending on HA molecular mass (HA-50, HA-300 and HA-1000) and using different CS:TPP ratios (1:0; 10:1 and 5:1). (A) Mean size (bars) and PI (symbols) at CS:TPP mass ratio of 1:0 (red), 10:1 (blue) and 5:1 (green). (B) Zeta potential at CS:TPP mass ratio of 1:0 (red), 10:1 (blue) and 5:1 (green). Values represent mean  $\pm$  S.D. ( $n=3$ ).

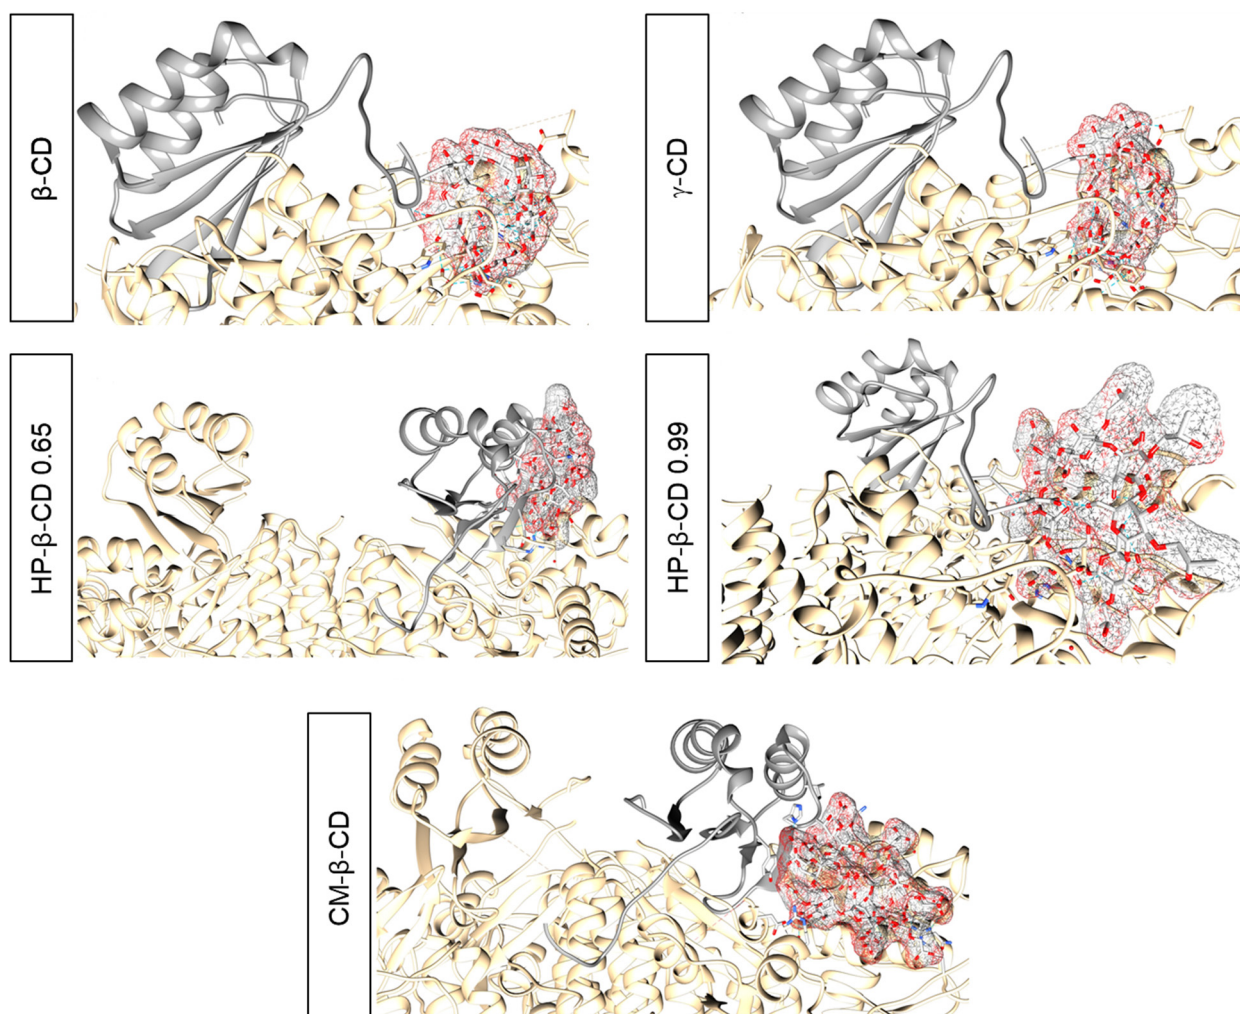

**Figure S3.** Depiction of the best blind molecular docking model of cyclodextrins (CDs;  $\beta$ -CD;  $\gamma$ -CD; HP- $\beta$ -CD 0.65; HP- $\beta$ -CD 0.99 and CM- $\beta$ -CD) with human phenylalanine hydroxylase (hPAH) and their interaction with the protein regulatory domain. The hPAH regulatory domain is evidenced in grey; amino-acid residues interacting (hydrogen bonds and chemical contacts) with CDs are evidenced with the elemental colours and the specific hydrogen bonds are coloured in blue.

**Table S1.** Average values of mean size, polydispersity index (PI) and zeta potential of chitosan (CS) nanoparticles modified with hyaluronic acid (HA) of different molecular masses (HA-50; HA-300 and HA-1000) and different cyclodextrins (CD) derivatives ( $\beta$ -CD;  $\gamma$ -CD; HP- $\beta$ -CD 0.65; HP- $\beta$ -CD 0.99 and CM- $\beta$ -CD) at different concentrations and using CS:tripolyphosphate (TPP) ratios of 1:0, 10:1 and 5:1. .

|             | CS:TPP<br>Mass ratio | Mean Size<br>(nm) | PI              | Zeta Potential<br>(mV) |
|-------------|----------------------|-------------------|-----------------|------------------------|
| HA-50       | 1:0                  | 310 $\pm$ 40      | 0.39 $\pm$ 0.18 | 33 $\pm$ 3.2           |
|             | 10:1                 | 252 $\pm$ 56      | 0.22 $\pm$ 0.05 | 30 $\pm$ 2.2           |
|             | 5:1                  | 232 $\pm$ 72      | 0.20 $\pm$ 0.02 | 25 $\pm$ 1.9           |
| HA-300      | 1:0                  | 309 $\pm$ 50      | 0.36 $\pm$ 0.13 | 32 $\pm$ 3.2           |
|             | 10:1                 | 288 $\pm$ 89      | 0.25 $\pm$ 0.06 | 29 $\pm$ 4.1           |
|             | 5:1                  | 231 $\pm$ 66      | 0.21 $\pm$ 0.02 | 25 $\pm$ 2.8           |
| HA-1000     | 1:0                  | 334 $\pm$ 66      | 0.32 $\pm$ 0.09 | 34 $\pm$ 2.9           |
|             | 10:1                 | 277 $\pm$ 85      | 0.25 $\pm$ 0.05 | 31 $\pm$ 2.4           |
|             | 5:1                  | 292 $\pm$ 115     | 0.25 $\pm$ 0.03 | 26 $\pm$ 2.3           |
| $\beta$ -CD | 1:0                  | 222 $\pm$ 64      | 0.77 $\pm$ 0.28 | 24 $\pm$ 3.8           |
|             | 10:1                 | 166 $\pm$ 16      | 0.36 $\pm$ 0.01 | 24 $\pm$ 5.7           |

|              |      |           |             |          |
|--------------|------|-----------|-------------|----------|
|              | 5:1  | 160 ± 29  | 0.27 ± 0.02 | 23 ± 3.2 |
| γ-CD         | 1:0  | 233 ± 64  | 0.63 ± 0.26 | 35 ± 2.1 |
|              | 10:1 | 163 ± 154 | 0.34 ± 0.03 | 32 ± 1.9 |
|              | 5:1  | 154 ± 15  | 0.27 ± 0.01 | 33 ± 1.8 |
|              |      |           |             |          |
| HP-β-CD 0.65 | 1:0  | 240 ± 68  | 0.60 ± 0.16 | 27 ± 6.2 |
|              | 10:1 | 162 ± 10  | 0.33 ± 0.04 | 23 ± 3.8 |
|              | 5:1  | 154 ± 21  | 0.27 ± 0.03 | 24 ± 4.3 |
|              |      |           |             |          |
| HP-β-CD 0.99 | 1:0  | 333 ± 111 | 0.59 ± 0.27 | 26 ± 4.7 |
|              | 10:1 | 154 ± 14  | 0.33 ± 0.06 | 24 ± 4.9 |
|              | 5:1  | 159 ± 19  | 0.29 ± 0.02 | 23 ± 4.1 |
|              |      |           |             |          |
| CM-β-CD      | 1:0  | 298 ± 55  | 0.32 ± 0.16 | 17 ± 3.6 |
|              | 10:1 | 214 ± 84  | 0.25 ± 0.08 | 17 ± 6.4 |
|              | 5:1  | 144 ± 9   | 0.26 ± 0.09 | 16 ± 5.4 |
|              |      |           |             |          |
